# Supplementary figures and images for: Comparative Proteomic Analysis of Lysine Acetylation in Fish CIK Cells Infected with Aquareovirus
Source: MDPI journal article supplement (doi:10.3390/ijms18112419), 2017-11-14

(a)

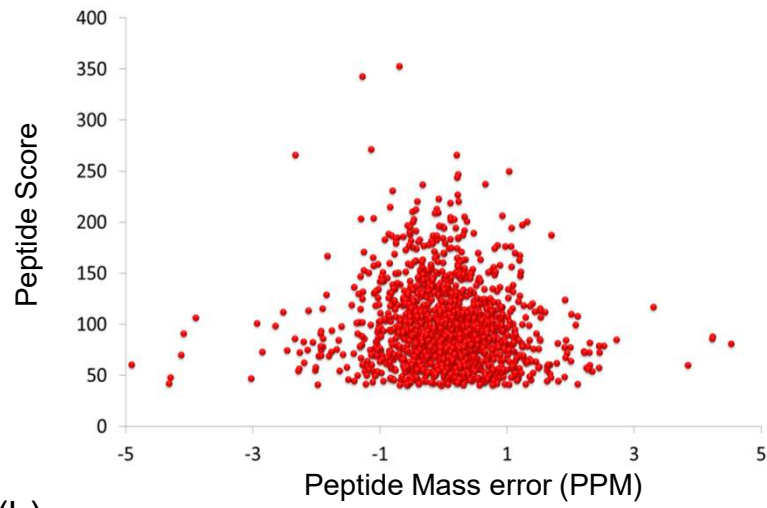

(b)

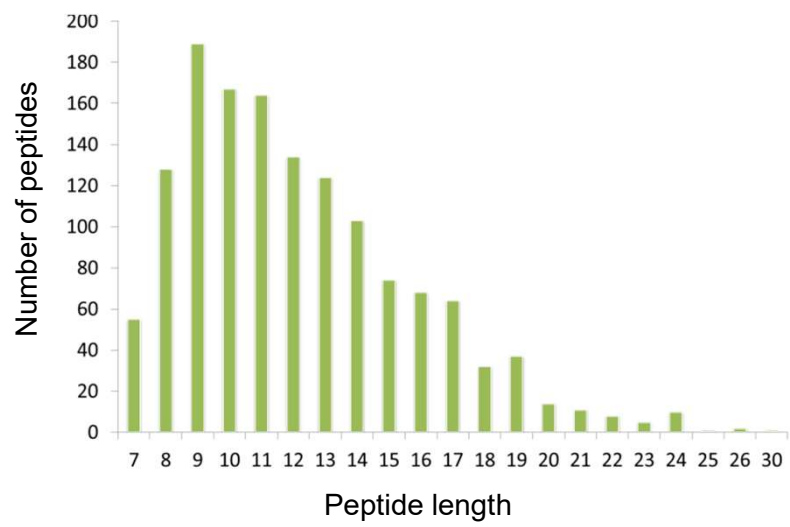

Supplement: s1 [file s1]
